# Supplementary material
Source: PubMed Central journal article supplement (PMC2492486)
Supplement: 0803904105_0803904105SI.pdf [file 0803904105_0803904105SI.pdf]

# Supporting Information

Duigou *et al.* 10.1073/pnas.0803904105

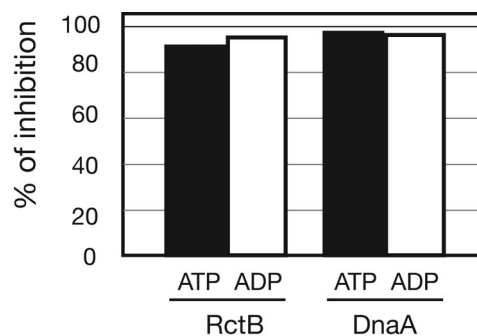

**Fig. S1.** Competitive ATP and ADP binding by RctB and DnaA. A total of 50 nM  $P^{32}$ - $\alpha$ ATP plus either 5 mM of unlabeled ATP or ADP were mixed with 80 nM of DnaA (*Right*) or 80 nM of RctB (*Left*), then the bound labeled ATP was detected by using the filter binding assay. The percent inhibition of binding of labeled ATP was calculated by dividing the amount of radioactive ATP bound in the presence of the unlabeled competitor by the amount of radioactive ATP bound in the absence of the competitor and then subtracting this value from 1. The values presented are an average from two experiments

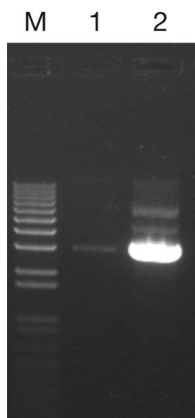

**Fig. S2.** Effect of R269S RctB on the copy number of an *oriC/llc*-based plasmid. Ethidium bromide-stained *oriC/llc*-based plasmid DNAs are shown. Plasmid DNA was extracted from overnight cultures and electrophoresed on an agarose gel. (lane 1) pYB289, an *oriC/llc*-based plasmid containing WT *rctB*, (lane 2) pYB286, and an *oriC/llc*-based plasmid containing *rctB* R269S, (lane M) 1 kb plus ladder. We used real-time qPCR to quantitatively compare the copy number of *oriC/llc*-based plasmids in *E. coli*. Real-time qPCR was performed as described (1) except that primers to amplify the *kan* gene (for plasmid DNA; 5'-TTCTTTCGCCTGATCGTCAG-3' and 5'-ATGAAAAGGTCGGCCTGCA-3') and *narW* (for *E. coli* chromosomal DNA; 5'-GGCAGGATCTCCTGTCATC-3' and 5'-GGTCGAATGGCAGGTAG -3') were used.

1. Burrus V, Waldor MK (2003) Control of SXT integration and excision. *J Bacteriol* 185:5045–5054.

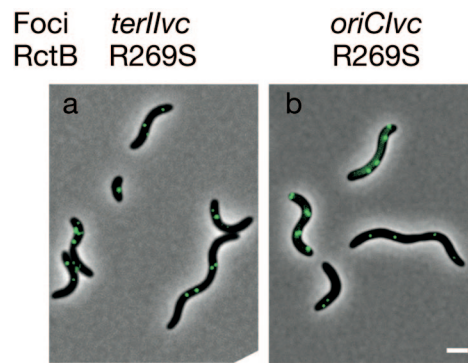

**Fig. S3.** *In vivo* characterization of *V. cholerae* overexpressing R269S RctB. Detection by fluorescent microscopy of *terIvc* (a) and *oriClvc* (b) using TetR-YFP in N16961 derivatives that contain *tet* operator arrays near these loci. Representative fields after 1 h of induction of TetR-YFP and RctB are shown. (Bar = 2  $\mu$ m.)

Table S1. Plasmids and *V. cholerae* strains used in this study

|               | Relevant characteristics/description                    | Ref./source |
|---------------|---------------------------------------------------------|-------------|
| Plasmid       |                                                         |             |
| pBR           | pBR322                                                  | NE BioLabs  |
| pET-RctB      | pET28B <i>rctB</i>                                      | This study  |
| pET-RctBR269S | pET28B <i>rctB</i> R269S                                | This study  |
| pGZ119EH      | IPTG-inducible expression vector                        | 1           |
| pLAU53        | Arabinose-inducible <i>lacI-cfp</i> and <i>tetR-yfp</i> | 2           |
| pOril         | pBR322 <i>oriClvc</i>                                   | This study  |
| pOrill        | pBR322 <i>oriClvc</i>                                   | This study  |
| pYB285        | pGZ119EH <i>rctB</i>                                    | This study  |
| pYB286        | <i>rctB</i> R269S <i>oriClvc</i> <i>rctA</i> <i>kan</i> | This study  |
| pYB289        | <i>rctB</i> <i>oriClvc</i> <i>kan</i>                   | This study  |
| Strain        |                                                         |             |
| N16961        | Sequenced El Tor <i>V. cholerae</i> strain              | 3           |
| YBB008        | N16961 VCA0008:: <i>tetOP</i>                           | 4           |
| YBB022        | N16961 VCA0596:: <i>tetOP</i>                           | This study  |
| YBB025        | N16961 VC0018:: <i>tetOP</i>                            | 5           |
| YBB682        | N16961 / pYB285                                         | This study  |
| YBB688        | N16961 / pYB291                                         | This study  |
| YBB703        | N16961 / pGZ119                                         | This study  |
| YBB727        | N16961 VCA0008:: <i>tetOP</i> /pLAU53 pGZ119            | This study  |
| YBB728        | N16961 VCA0008:: <i>tetOP</i> /pLAU53 pYB285            | This study  |
| YBB729        | N16961 VCA0008:: <i>tetOP</i> /pLAU53 pYB291            | This study  |
| YBB732        | N16961 VCA0596:: <i>tetOP</i> /pLAU53 pYB291            | This study  |
| YBB733        | N16961 VC0018:: <i>tetOP</i> /pLAU53 pYB291             | This study  |

1. Lessl M, et al. (1992) Dissection of IncP conjugative plasmid transfer: Definition of the transfer region Tra2 by mobilization of the Tra1 region in trans. *J Bacteriol* 174:2493–2500.
2. Lau IF, et al. (2003) Spatial and temporal organization of replicating *Escherichia coli* chromosomes. *Mol Microbiol* 49:731–743.
3. Heidelberg JF et al. (2000) DNA sequence of both chromosomes of the cholera pathogen *Vibrio cholerae*. *Nature* 406:477–483.
4. Yamaichi Y, Fogel MA, McLeod SM, Hui MP, Waldor MK (2007) Distinct centromere-like *parS* sites on the two chromosomes of *Vibrio* spp. *J Bacteriol* 189:5314–5324.
5. Fogel MA, Waldor MK (2006) A dynamic, mitotic-like mechanism for bacterial chromosome segregation. *Genes Dev* 20:3269–3282.
